# Susceptibility of novel Italian rice varieties to panicle blast under field conditions.

Gabriele Mongiano<sup>1\*</sup>, Patrizia Titone<sup>1</sup>, Simone Bregaglio<sup>2</sup>, Luigi Tamborini<sup>1</sup>.

<sup>1</sup>CREA - Council for Agricultural Research and Economics, Research Centre for Plant Protection and Certification, SS 11 km 2,500, 13100 Vercelli, Italy

<sup>2</sup> CREA - Council for Agricultural Research and Economics, Research Centre for Agriculture and Environment, via di Corticella 133, 40128, Bologna, Italy.

\*Corresponding author at: [gabriele.mongiano@crea.gov.it](mailto:gabriele.mongiano@crea.gov.it)

## Abstract

A panel of 48 of Italian rice varieties recently included in the Common Catalogue of Agricultural Species was evaluated for susceptibility to rice blast (*Magnaporthe oryzae* B. Couch) in open field conditions. Trials were performed under highly favourable conditions for the pathogen, and visual assessments focused on the severity and incidence of panicle blast symptoms. Only 8% of newly released varieties were classified as resistant, whereas 40% were highly susceptible. Our results confirmed that a fungicide treatment with tricyclazole reduces the disease incidence and severity and that the effect is measurable up to six weeks after treatment. A double application of tricyclazole at stem elongation and booting stage was more effective than the single application at booting. This study provides ready-to-use information to support rice growers in variety choice and planning of plant protection strategies, as well as public institutions in the emanation of guidelines for integrated pest management.

## Keywords

*Magnaporthe oryzae*, *Oryza sativa*, genetic resistance, tricyclazole

## Acknowledgements.

Corteva (DU Pont, DOW Agrosiences) for financial support for the research activities.  
AgriDigit-Agromodelli project (DM n. 36502 of 20/12/2018), funded by the Italian Ministry of Agricultural, Food and Forestry Policies and Tourism.

# Introduction

Over the last 25 years, about 20 new rice varieties were included annually in the Common Catalogue of Agricultural Species, half of which came from the National Register of Italy. The inclusion of a new variety in the National Register depends by its distinguishability from the other varieties of common knowledge and on its value for cultivation and use (VCU, Ministero delle Politiche Agricole Alimentari e Forestali 2014). In essence, an admissible VCU may be an improvement, when compared to the varieties of common knowledge, regarding its productivity, quality of the product, resistance to pests and diseases, as well as other technological and commercial characteristics. One of the main determinants of the spread of cultivation of a new rice variety is its resistance to major diseases. Nevertheless, susceptible varieties with valuable qualitative traits are still widely cultivated like Carnaroli and Vialone Nano, two blast-susceptible accessions traditionally used for the preparation of risotto. The breeding of disease tolerant varieties with superior technological and commercial characteristics requires great economical efforts and extended periods. It is, therefore, crucial to deepen the knowledge about the susceptibility to blast disease of current rice varieties, in order to support farmers in variety choice and related plant protection strategies.

In Italy, the most destructive rice disease is blast, caused by *Magnaporthe oryzae* B. C. Couch (anamorph *Pyricularia oryzae* Cavara) (Couch and Kohn 2002; Na et al. 2019), which determines substantial yield losses and declines in milling rice yield (Bregaglio et al. 2017; Webster and Gunnell 1992). Manifestations of the disease vary along with rice phenology. Symptoms occur primarily on the leaves (leaf blast, before flowering) and the panicle (panicle blast, PB, during ripening), the latter leading to the most considerable yield losses (Webster and Gunnell 1992), with low correlation between the two symptomatology (Biloni and Lorenzi 2002). To date, genetic resistance is the most effective control method for PB, as more than 100 genes and about 500 QTLs capable of conferring pathogen resistance have been isolated globally (Li et al. 2007; Miah et al. 2012). However, genetic resistance is rapidly overcome by the fungus within 3 to 5 years due to the high mutation rate of the pathogen populations (Oliveira-Garcia and Valent 2015; Rama Devi et al. 2015).

Five years ago, we evaluated 105 Italian varieties for PB susceptibility, concluding that, although cultivated on the 80% of the whole Italian rice area, 68% of the tested varieties were susceptible

Mongiano *et al.* 2020, submitted to European Journal of Plant Pathology

(Titone et al. 2015). Modern varieties were more resistant than old accessions, proving the constant breeding efforts towards the identification of new sources of genetic resistance. That study reported that a single fungicide application with tricyclazole during flowering was able to reduce the PB incidence by an average of 55%. However, this active substance is not anymore authorized in Europe (Reg. EC No. 1107/2009), although a new examination is underway by the competent authority. The present work aimed at evaluating the degree of susceptibility to PB in 48 new rice varieties, recently registered in the Common Catalogue and currently grown in Italy. The new rice varieties were compared with 14 reference varieties with different degrees of blast resistance (Titone et al. 2015) in dedicated field trials. Considering the possible reintroduction of tricyclazole among the admitted active substances in rice protection, single and double applications were tested, and their efficacy was also evaluated outside the period of protection (6 weeks after treatment). The information released here is ready-to-use for rice growers, to optimize plant protection strategies according to the susceptibility of the cultivated variety, as well as for public entities, which can rely on our results to plan legislative measures for integrated pest management.

## Methods

### Experimental design

Field trials were conducted during the rice-growing seasons 2015, 2016, and 2018 in “Lomellina” area (45°17'21.3"N 8°51'59.4"E, 116 meters a.s.l., Lombardy region) in the core of the Italian rice cultivation area. The site presents favourable conditions for the development of rice blast, i.e. endemic presence of the pathogen and sandy soil. Sowing of seed occurred on May 11<sup>th</sup> in 2015, on May 17<sup>th</sup> in 2016, and on May 18<sup>th</sup> in 2018 using a pneumatic seed drill. The experimental unit consisted of a two-meters row interspersed with spreader rows planted with the highly blast-susceptible cultivar “Deneb”. After the 3<sup>rd</sup> leaf stage the field trial was flooded until the beginning of ripening stage. A total N amount of 210 kg ha<sup>-1</sup> was distributed in three applications (after 3<sup>rd</sup> leaf unfolding, during tillering, and at panicle differentiation stage), to further contribute to the development of disease, as high N rates are known to set a conducive environment for the blast pathogen (Ballini et al. 2013).

Mongiano *et al.* 2020, submitted to European Journal of Plant Pathology

86 We used a strip split-plot randomized complete block design with four replications: tricyclazole  
87 was tested at the recommended rate (equivalent to 450 a.i. g ha<sup>-1</sup>) in single application at booting  
88 stage and in double application at stem elongation and booting; untreated plots were used as  
89 control.  
90 The 48 rice varieties tested were registered in the period 2015-2018, with an additional group of 14  
91 reference varieties which were known to have different blast susceptibility (Titone et al. 2015).  
92 Each variety has been tested in two out of the three years, while the reference varieties were grown  
93 in the three years. Supplementary Table S1 present the list of varieties included in the study, along  
94 with information on the shape of the caryopsis, the European market classification and the  
95 cultivated area in 2018.

## 96 **Environmental conditions**

97 The temperatures occurred in the three years of the experiment are shown in Supplementary Figure  
98 S1. The 2015 growing season was characterized by a remarkably hot July, which caused a  
99 contraction in the duration of the vegetative cycles. The months of June and July were  
100 characterized by high temperatures (up to 37 °C) and relative humidity until the last week of July.  
101 During the middle of August, frequent rainfalls led to lower temperatures and favourable  
102 conditions for the development of the pathogen. In May and June 2016, air temperature was  
103 below-average, postponing the time of anthesis. In July and August temperatures were in line with  
104 the average, favouring a gradual recovery of the initial vegetative delay. The month of September  
105 was the hottest of the last ten years, with an average increase in maximum temperatures of about  
106 2°C. Rainfall over the whole season was scarce, particularly in April, August and September. On  
107 average, rainfall was about 20% lower than the last decade. The 2018 growing season was warmer  
108 than the average of the last 11 years, with heavy rainfall towards the end of the season. Monthly  
109 average temperatures were always higher than the average of the last 11 years, especially in July  
110 and August, when minimum and maximum temperatures were 1 °C and 2.5 °C higher,  
111 respectively.

## 112 **Assessment of panicle blast severity and incidence**

113 Plots were evaluated twice, after the treatment at booting stage: three and six weeks after treatment  
114 (WAT), when physiological maturity was almost reached. PB severity was assessed following the  
115 Standard Evaluation System proposed by the International Rice Research Institute (IRRI 2002).

Mongiano *et al.* 2020, submitted to European Journal of Plant Pathology

116 This method consists of a six scores ordinal scale from 0 to 9 based on the occurrence and  
117 extension of lesions on panicle internode and branches, also considering the number of filled  
118 grains, as follows: 0 - no visible lesions or minor lesions, 1 - lesions on several pedicels or  
119 secondary branches, 3 - lesions on a few primary branches or panicle primary axis, 5 - lesion  
120 partially around the panicle node/internode or the lower part of panicle primary axis, 7 - lesion  
121 completely around panicle node/internode or panicle primary with more than 30% of filled grains,  
122 9 - lesions completely around panicle node/internode or primary axis with less than 30% of filled  
123 grains. We assigned a single score to the plot according to the most frequent observed symptom.  
124 Disease incidence was estimated visually as the ratio of the panicles showing PB disease over the  
125 total number of panicles in the plot (%). PB incidence at 3 and 6 WAT was used to calculate the  
126 Area Under Disease Progress Stairs (Simko and Piepho 2012), a method suited to combine  
127 multiple observations in a single value. AUDPS was used to classify varieties as Resistant (R,  
128  $AUDPS \leq 5$ ), Moderately Resistant (MR,  $5 < AUDPS \leq 10$ ), Moderately Susceptible (MS,  $10 <$   
129  $AUDPS \leq 15$ ), Susceptible (S,  $AUDPS > 15$ ). This classification has been developed consistently  
130 to previously published data on the reference varieties (Titone et al. 2015).

## 131 **Data analysis**

132 A chi-square test of independence was performed to evaluate the relation between fungicide  
133 treatment and disease severity. The AUDPS values were analysed by Generalised Least Square  
134 model considering variety, treatment, and year effects, and accounting for heteroskedasticity due  
135 to treatment and year, by specifying their variance structures as different variances per stratum  
136 (Pinheiro and Bates 2006). The significance of the considered effects was tested using a Wald  $\chi^2$   
137 test (Fox 1997). The differences between levels of the significant effects were investigated by  
138 computing the estimated marginal means (EMM), a method to estimate the least-square means  
139 with unbalanced data, and then contrasts for the pairwise comparisons were generated (Searle et al.  
140 1980). Estimates of the effectiveness of the treatment in reducing PB incidence and severity were  
141 calculated as the reduction in PB incidence between untreated and treated plots. Results were  
142 reported as mean reduction and relative standard error using the notation  $\bar{X} \pm SE$ . Boxplot were  
143 drawn to show the median (horizontal line), interquartile range (IQR as upper and lower hinges,  
144 i.e. 75th and 25th percentiles, respectively), and 95% confidence intervals around the median (the  
145 whiskers, calculated as following:

$$\frac{IQR \cdot 1.58}{\sqrt{n}}$$

146 Data analysis was performed using the R statistical software (R Core Team 2017) and *nlme* R  
147 package (Pinheiro et al. 2019). Graphics were created using the ‘*ggplot*’ R package (Wickham  
148 2016).

## 149 Results

### 150 Disease severity

151 The frequency of the PB severity assessed on the sixty-two rice varieties (48 newly registered  
152 cultivars and 14 reference varieties) in the three years of the experiment is presented in Figure 1,  
153 considering the untreated control and single and double fungicide applications.

154 The increase of PB severity from 3 to 6 WAT was clear in the three years of the experiment  
155 (Figure 1). In the early assessment, the most frequent score was 1 (lesions on several pedicels or  
156 secondary branches) in 2015 (77%) and 2016 (54%), while in 2018 it was 3 (30%, lesions on a few  
157 primary branches or panicle primary axis). In late assessments, the PB severity reached the  
158 maximum score of 9 (lesions completely around panicle node/internode or primary axis with less  
159 than 30% of filled grains), in more than 40% of the varieties in the three years. The PB symptoms  
160 onset was late in 2015 and 2016, whereas their progression was faster than in 2018, with large  
161 differences between early and late assessment. In 2018 the PB onset was earlier, with varieties  
162 evenly assigned to scores from 1 to 7 at 3 WAT; PB then slowly progressed during ripening, with  
163 little or no change for some cultivars at 6 WAT. We observed a general reduction in PB severity in  
164 the treated plots compared to the control at 3 and 6 WAT. At 3 WAT, the average ratio of varieties  
165 in which the assigned PB severity score was 0 increased from 43% in untreated plots to 51% in  
166 plots with a single application and to 55% in plots with double application of tricyclazole. In the  
167 late assessment (6 WAT), the average ratio of varieties assigned to PB severity score of 9  
168 decreased from 57% (untreated) to 45% and 40% in plots with a single and double fungicide  
169 application, respectively. In general, fungicide treatment led to a shift in the frequencies of treated  
170 plots with respect to control, with a steep increase in the frequencies of lower PB scores. A  $\chi^2$  test  
171 of independence performed to compare the frequencies of varieties assigned to disease severity  
172 scores among treatments indicated a significant effect, both at 3 WAT –  $\chi^2(10) = 38.32, p < 0.001$   
173 – and 6 WAT –  $\chi^2(10) = 44.33, p < 0.001$ .

## 174 **Disease incidence**

175 The assessment of PB incidence expressed as the ratio of infected panicles over the total number  
176 of panicles in the plot led to results similar to PB severity (Figure 2). The correlation between PB  
177 severity and incidence was evaluated by means of Spearman's rank correlation coefficient, which  
178 highlighted a high degree of correlation both in early ( $\rho = .85, p < .05$ ) and late ( $\rho = .79, p < .05$ )  
179 assessments.

180 As reported for PB severity, the onset of PB in 2018 was earlier than in the other two years, with  
181 high variability already at 3 WAT, when PB was generally very low in 2015 and 2016 ( $\bar{X} < 1\%$ ).  
182 The interannual variability of PB severity and incidence can be attributed to the environmental  
183 conditions occurring during the years rice-growing season, rather than to the sample composition  
184 since comparable trends in reference and tested cultivars were outlined throughout the experiment.  
185 Another element supporting this hypothesis is that leaf blast symptoms in 2018 were much more  
186 visible in pre-flowering, especially on the extremely susceptible varieties (data not shown). The  
187 progress of the disease evaluated in untreated plots from 3 to 6 WAT was also different in the  
188 three years. Despite the low PB incidence at 3 WAT ( $\bar{X} = 0\%$ ), median PB incidence at 6 WAT  
189 was 80% in 2015. A slightly smoothed increasing trend was observed in 2016 ( $\bar{X} = 1\%$  at 3 WAT,  
190  $\bar{X} = 50\%$  at 6 WAT), while in 2018 the progress of PB was slower, leading to a lower median  
191 incidence at 6 WAT (40%). On average, PB incidence in untreated plots increased by 82% during  
192 the three weeks between the early and late assessments in the three years. PB incidence in treated  
193 plots was generally lower than in control both in early ( $-61\% \pm 5\%$  incidence with the double  
194 application,  $-25\% \pm 9\%$  with single application) and late assessments ( $-22\% \pm 4\%$  with the double  
195 application,  $-13\% \pm 4\%$  with single application).

196

## 197 **Disease dynamics (AUDPS)**

198 The AUDPS calculation allowed combining in a single value early and late assessments of PB  
199 incidence, and highlighted a comparable trend between untreated and treated plots in the three  
200 years (Figure 3). The GLS model applied to evaluate the effects of cultivar, treatment, and year on  
201 AUDPS obtained a pseudo  $R^2$  value of 48.5%, indicating adequate fit and large amount of  
202 explained variance. Model diagnostics, i.e. Quantile-Quantile plot and plot of Fitted values versus

Mongiano *et al.* 2020, submitted to European Journal of Plant Pathology

203 Standardised Residuals, are reported in Supplementary Figure S2 and S3. The significance of the  
204 considered sources of variation was then tested with Wald's  $\chi^2$  test (Table 1).

205 *Table 1 – Results of the  $\chi^2$  test performed on AUDPS data considering the treatment (three levels, i.e.*  
206 *untreated, single, and double application of tricyclazole), year, and cultivar effect.*

|           | D.F. | $\chi^2$ | Significance |
|-----------|------|----------|--------------|
| Cultivar  | 62   | 2838     | < 0.001 ***  |
| Treatment | 3    | 163      | < 0.001 ***  |
| Year      | 2    | 9.065    | 0.01075 *    |
| Residuals | 1608 |          |              |

207  
208 All the factors were significant ( $p < 0.05$ ) in affecting AUDPS. We classified the 48 new varieties  
209 as Resistant (R, 0 - 5), Moderately Resistant (MR, 5.1 - 10), Moderately Susceptible (MS, 10.1 -  
210 15), Susceptible (S, AUDPS > 15) to PB according to the average value of AUDPS in untreated  
211 plots, in agreement with published data on reference cultivars (Titone et al. 2015). We updated the  
212 former classification, which was based on a single early assessment of PB incidence, in order to  
213 consider AUDPS-based rating. Table 2 reports the estimated marginal mean, standard error,  
214 confidence intervals (95% confidence), mean Incidence (both in early and late assessments), and  
215 AUDPS calculated on untreated plots, for each variety tested. The mean AUDPS and 95%  
216 confidence intervals around the mean calculated for each cultivar in untreated plots are shown in  
217 Figure 4.



218 *Table 2 – AUDPS estimated marginal means (EMM) for all the levels of the variety factor. Standard error*  
 219 *(SE), lower confidence limit (LCL), upper confidence limit (UCL), early and late PB incidence assessed in*  
 220 *untreated plots (Inc. Early, Inc. Late), mean area under disease progress stairs calculated in untreated plots*  
 221 *(AUDPS, untreated), and assigned tolerance class are also reported. The horizontal triple line separates the*  
 222 *reference cultivars included in Titone et al. 2015 from those used exclusively in this study. Titone, P.,*  
 223 *Mongiano, G., & Tamborini, L. (2015). Resistance to neck blast caused by *Pyricularia oryzae* in Italian rice*  
 224 *cultivars. European Journal of Plant Pathology, 142(1), 49–59. doi:10.1007/s10658-014-0588-1*

| Cultivar         | EMM  | SE  | LCL  | UCL  | Inc.<br>Early | Inc.<br>Late | AUDPS<br>untreated | Tolerance<br>class |
|------------------|------|-----|------|------|---------------|--------------|--------------------|--------------------|
| Clxl745          | 0.2  | 0.2 | 0    | 0.7  | 0%            | 1%           | 0.2                | R                  |
| Mare Cl          | 3.5  | 0.6 | 2.4  | 4.7  | 2%            | 20%          | 4                  | R                  |
| Ellebi           | 7    | 1   | 5.1  | 8.8  | 6%            | 37%          | 9                  | MR                 |
| Cl26             | 8.5  | 1   | 6.5  | 10.5 | 4%            | 46%          | 10                 | MS                 |
| Roma             | 10.3 | 1.1 | 8.2  | 12.5 | 9%            | 56%          | 14                 | MS                 |
| Centauro         | 12.6 | 1.1 | 10.5 | 14.7 | 9%            | 56%          | 14                 | MS                 |
| Thaibonnet       | 14.2 | 1.3 | 11.7 | 16.7 | 4%            | 68%          | 15                 | MS                 |
| Ronaldo          | 12.8 | 1.2 | 10.5 | 15.1 | 8%            | 72%          | 17                 | S                  |
| Carnise Precoce  | 16.6 | 1.4 | 13.8 | 19.4 | 23%           | 65%          | 18                 | S                  |
| S. Andrea        | 14.4 | 1.2 | 12.1 | 16.8 | 23%           | 70%          | 20                 | S                  |
| Karnak           | 19   | 2   | 15   | 23   | 22%           | 85%          | 22                 | S                  |
| Gladio           | 18   | 1.3 | 15.5 | 20.5 | 30%           | 78%          | 23                 | S                  |
| Loto             | 24.8 | 1.3 | 22.2 | 27.4 | 40%           | 92%          | 28                 | S                  |
| Ambra            | 25.2 | 1.5 | 22.2 | 28.2 | 47%           | 96%          | 30                 | S                  |
| Deneb            | 30.2 | 1.3 | 27.6 | 32.7 | 65%           | 99%          | 34                 | S                  |
| Inov Cl          | 2.8  | 0.7 | 1.4  | 4.2  | 1%            | 9%           | 2                  | R                  |
| Nero Beppino     | 6    | 1.6 | 2.8  | 9.1  | 0%            | 18%          | 3.8                | R                  |
| Cassiopea        | 3.4  | 0.8 | 1.8  | 5    | 0%            | 18%          | 3.9                | R                  |
| Tuna             | 5.6  | 1   | 3.6  | 7.7  | 2%            | 21%          | 4.7                | R                  |
| Ribaldo          | 6.3  | 1.3 | 3.8  | 8.7  | 1%            | 27%          | 5.9                | MR                 |
| Gigante Vercelli | 5.9  | 1.2 | 3.6  | 8.2  | 2%            | 26%          | 6                  | MR                 |
| Re Cl            | 4.4  | 0.7 | 3    | 5.8  | 7%            | 22%          | 6.2                | MR                 |
| Cl 28            | 4.1  | 0.8 | 2.5  | 5.7  | 0%            | 30%          | 6.2                | MR                 |
| Carnaval         | 3.1  | 1.2 | 0.8  | 5.5  | 0%            | 30%          | 6.2                | MR                 |
| Cl111            | 6.5  | 1.2 | 4.2  | 8.8  | 0%            | 36%          | 7.5                | MR                 |
| Cammeo           | 5.3  | 0.9 | 3.6  | 7    | 8%            | 34%          | 8.7                | MR                 |
| Rg202            | 7.1  | 1   | 5.2  | 9    | 7%            | 34%          | 8.7                | MR                 |
| David Cl         | 7.3  | 1.1 | 5.2  | 9.5  | 1%            | 42%          | 9.2                | MR                 |
| Caravaggio       | 5.6  | 1.4 | 2.8  | 8.3  | 14%           | 31%          | 9.4                | MR                 |
| Filippo          | 8.7  | 1.3 | 6.1  | 11.3 | 7%            | 38%          | 9.4                | MR                 |
| Agave            | 7.2  | 1.1 | 5    | 9.3  | 1%            | 44%          | 9.5                | MR                 |
| Delfo            | 10.1 | 1.9 | 6.4  | 13.8 | 0%            | 48%          | 10.1               | MS                 |
| Apache Red       | 6.2  | 1.1 | 4.1  | 8.4  | 1%            | 48%          | 10.3               | MS                 |
| Violet Nori      | 8    | 1.2 | 5.6  | 10.4 | 0%            | 51%          | 10.8               | MS                 |
| Fuoco            | 8.1  | 0.9 | 6.3  | 9.9  | 6%            | 48%          | 11.3               | MS                 |
| Adone            | 8.9  | 1   | 7    | 10.9 | 2%            | 52%          | 11.6               | MS                 |
| Casanova         | 11.8 | 1.4 | 9.2  | 14.5 | 1%            | 57%          | 12.1               | MS                 |
| Il Cardinale     | 11   | 1.6 | 7.8  | 14.1 | 21%           | 39%          | 12.8               | MS                 |
| Nerone Gold      | 12.6 | 1.8 | 9.1  | 16   | 14%           | 48%          | 13                 | MS                 |
| Aniride          | 11.1 | 1.6 | 7.9  | 14.3 | 4%            | 58%          | 13                 | MS                 |
| Fiamma           | 13   | 1.1 | 10.8 | 15.2 | 5%            | 58%          | 13.3               | MS                 |
| Cl33             | 12.4 | 1.2 | 9.9  | 14.8 | 4%            | 61%          | 13.7               | MS                 |
| Leonardo         | 14.7 | 1.3 | 12.1 | 17.3 | 1%            | 68%          | 14.4               | MS                 |
| Telemaco         | 12.5 | 1.4 | 9.8  | 15.2 | 5%            | 64%          | 14.4               | MS                 |
| Cl a01           | 13.6 | 1.2 | 11.2 | 16   | 11%           | 62%          | 15.5               | S                  |
| Anteo            | 12.4 | 1.3 | 9.8  | 15   | 1%            | 74%          | 15.6               | S                  |
| Gilda            | 13.1 | 1.4 | 10.2 | 15.9 | 17%           | 61%          | 16.3               | S                  |
| Ilmoro           | 15.1 | 1.2 | 12.7 | 17.5 | 0%            | 79%          | 16.6               | S                  |
| Orange Nori      | 13.7 | 1.3 | 11.1 | 16.3 | 8%            | 73%          | 17                 | S                  |
| Allegro          | 13   | 1.1 | 10.8 | 15.3 | 2%            | 81%          | 17.5               | S                  |
| Sanluca          | 16.6 | 1.2 | 14.3 | 18.8 | 1%            | 87%          | 18.5               | S                  |
| Dante            | 18.1 | 2   | 14.2 | 22   | 21%           | 68%          | 18.6               | S                  |
| Samurai          | 14.6 | 1.5 | 11.7 | 17.6 | 18%           | 74%          | 19.2               | S                  |
| Archimede        | 13.3 | 1.5 | 10.3 | 16.4 | 16%           | 77%          | 19.4               | S                  |
| Macchiavelli     | 15.7 | 1.5 | 12.7 | 18.7 | 11%           | 86%          | 20.4               | S                  |
| Aristotele       | 19   | 2.1 | 14.9 | 23.1 | 18%           | 81%          | 20.9               | S                  |
| Egeo Cl          | 16.3 | 1.3 | 13.7 | 18.9 | 10%           | 91%          | 21.1               | S                  |
| Reperso          | 18.3 | 1.8 | 14.7 | 21.9 | 15%           | 88%          | 21.7               | S                  |

Mongiano *et al.* 2020, submitted to European Journal of Plant Pathology

| Cultivar    | EMM  | SE  | LCL  | UCL  | Inc.<br>Early | Inc.<br>Late | AUDPS<br>untreated | Tolerance<br>class |
|-------------|------|-----|------|------|---------------|--------------|--------------------|--------------------|
| Mirai       | 17.5 | 1.7 | 14.3 | 20.8 | 18%           | 88%          | 22.2               | S                  |
| Felix       | 21.9 | 1.3 | 19.2 | 24.5 | 16%           | 96%          | 23.6               | S                  |
| Marchese CI | 19.3 | 1.4 | 16.6 | 21.9 | 28%           | 87%          | 24.1               | S                  |
| Gelso       | 24.5 | 1.7 | 21.1 | 27.9 | 36%           | 85%          | 25.3               | S                  |
| CI388       | 21.3 | 1.7 | 17.9 | 24.7 | 32%           | 89%          | 25.5               | S                  |

225

226 The large variability in the varietal response to PB incidence and severity was confirmed by Wald  
227  $\chi^2$  test that evidenced highly significant differences among cultivars ( $p < 0.001$ , Table 1). While  
228 our method aimed at releasing a consistent classification with previous findings, we observed a  
229 significantly different response in some reference cultivars compared to our previous assessment  
230 (Titone *et al.* 2015). Roma (AUDPS 13.72) and Thaibonnet (AUDPS 14.98) showed a lower  
231 tolerance to PB compared to previous classifications, changing from MR to MS class. Karnak,  
232 Ronaldo, and S. Andrea were formerly classified as MS, while in this experiment they showed a  
233 very low degree of tolerance to PB and were classified as S, with mean AUDPS of 22.49, 16.84,  
234 and 19.6, respectively. Centauro was the only reference cultivar that showed higher tolerance to  
235 PB, passing from S to MS, with a mean AUDPS of 13.74 (early incidence 9%, late incidence  
236 56%). The cultivar CI 26, formerly classified as Resistant, consistently showed lower tolerance to  
237 the disease with average AUDPS of 10.54 (early Incidence 3.9%, late Incidence 46.2%). The  
238 remaining reference cultivars presented a response similar to the past and were classified  
239 consistently with published data. Cultivar Deneb, used as susceptible control and sown as  
240 “spreader row”, showed severe symptoms and a high ratio of infected panicles yet in the early  
241 assessment (average incidence 65%), and was entirely affected by the disease at 6 WAT (average  
242 incidence 99%).  
243 During the experiment, we observed a very variable varietal response to PB (Figure 4). Only four  
244 cultivars were classified as Resistant, while 13 were MR, 13 MS, and 20 S. Among Resistant  
245 varieties, only CLXL745 (included as reference) and Inov CL showed very low incidence (<10%)  
246 both in early and late assessments. They are hybrid cultivars with late time of anthesis and long  
247 vegetative phase, which were developed in Texas and recently introduced in Italy. The other  
248 genotypes showed little to no symptoms in the early assessment but reached up to 21% PB  
249 incidence in the late assessment. MR cultivars showed an initial tolerance to disease, with PB  
250 incidence comprised between 0% and 14%, and rapid disease progress at 6 WAT, leading to PB  
251 incidence ranging from 22% to 44%. MS cultivars response in the early assessment was widely  
252 variable (0 - 21.4%), with high late PB incidence, ranging from 39.4% to 67.5%. The response of

Mongiano *et al.* 2020, submitted to European Journal of Plant Pathology

253 S cultivars at 3 WAT was even more variable compared to MS group (range 0.6% - 35.6%), and  
254 final PB incidence comprised between 61% and 99%.

255 Table 3 reports the estimated marginal means with 95% confidence intervals of the levels of  
256 treatment and year factor, with a letter-based representation of all pairwise comparisons.

257 *Table 3 – AUDPS estimated marginal means (EMM) for all the levels of the year and treatment effect*  
258 *(separated by horizontal line) with standard error (SE), and 95% lower (LCL) and upper confidence limit*  
259 *(UCL).*

|              | EMM   | SE     | LCL   | UCL   | Subgroup |
|--------------|-------|--------|-------|-------|----------|
| Year 2015    | 12.66 | 0.2291 | 12.21 | 13.11 | a        |
| Year 2016    | 12.21 | 0.2264 | 11.76 | 12.65 | ab       |
| Year 2018    | 11.52 | 0.3379 | 10.86 | 12.18 | b        |
| Double appl. | 10.86 | 0.2577 | 10.35 | 11.36 | a        |
| Single appl. | 12.00 | 0.2496 | 11.51 | 12.49 | b        |
| Untreated    | 13.53 | 0.2497 | 13.04 | 14.02 | c        |

260 Single (11.27% reduction) and double (20.26% reduction) fungicide applications significantly  
261 reduced AUDPS compared to untreated plots. The differences between years were less marked,  
262 with significant differences only between 2015 (12.66) and 2018 (11.52), but not with 2016  
263 (12.21).

## 264 Discussion

265 Genetic tolerance to blast fungus *Magnaporthe oryzae* B. C. Couch has been the primary driver of  
266 Italian rice breeding throughout the twentieth century and until today (Faivre-Rampant *et al.* 2010;  
267 Mantegazza *et al.* 2008; Mongiano *et al.* 2018; Spada *et al.* 2004). PB is the most devastating  
268 symptomatology, occurring during early grain filling stage on the panicle and panicle neck node  
269 (Webster and Gunnell 1992). It causes direct yield losses by impairing the translocation of  
270 carbohydrates from the vegetative parts to grains (Koutroubas *et al.* 2009). Genetic resistance is  
271 undoubtedly the most effective method of control to date (Deng *et al.* 2017; Miah *et al.* 2012;  
272 Ramalingam *et al.* 2003; Xiao *et al.* 2017; Zhao *et al.* 2018), and recent breakthroughs in genetic  
273 improvement have opened up a plethora of new options in this regard (Wang *et al.* 2016; Weeks *et*  
274 *al.* 2016). Besides fungicide treatments, rice growers can choose different crop management  
275 strategies to contain the disease like, e.g. reducing nitrogen inputs and modulating the time of  
276 sowing (Ballini *et al.* 2013). However, the knowledge of the degree of susceptibility of the  
277 available rice varieties is the fundamental prerequisite to plan management strategies to optimize  
278 farmers actions.

Mongiano *et al.* 2020, submitted to European Journal of Plant Pathology

279 In a previous study (Titone et al. 2015) we examined the tolerance of 105 Italian cultivars to rice  
 280 blast disease and this characterization had been used by regional authorities to issue variety-  
 281 specific guidelines for the sustainable use of plant protection products under the Water Framework  
 282 Directive 2000/60/EC (European Council/European Parliament 2000; Regione Piemonte 2016).  
 283 Since 2015, many new Italian varieties have been introduced, and there is the need to extend the  
 284 classification to the new releases. Furthermore, the most widely used active compound for PB  
 285 control, tricyclazole, is currently not authorized in Europe, unless readmission following  
 286 evaluation according to Reg. (EC) No. 1107/2009 could be possible.  
 287 During the three years of experiment, we observed a considerable impact of blast disease, favoured  
 288 by the extremely conducive environment established in the experimental trial, i.e. high nitrogen  
 289 rates applied in sandy soil, late sowing, and the presence of “spreader rows” sown with the highly  
 290 susceptible cultivar Deneb. At the first assessment (3 WAT, grain filling stage), we generally  
 291 observed low PB severity and incidence, while in the second assessment (6 WAT, physiological  
 292 maturity) PB reached high severity and incidence. The temporal dynamics of the epidemic were  
 293 similar in 2015 and 2016 and different from 2018. The main differences concerned the time of  
 294 disease onset and the rate of increase of PB incidence and severity from early to late assessment.  
 295 While in 2015 and 2016 PB symptoms mainly developed after the first assessment at 3 WAT, in  
 296 2018 disease onset was earlier, with also moderate infection on the leaves before flowering.  
 297 Nonetheless, the PB incidence at 6 WAT in 2018 was lower compared to 2015 and 2016. This  
 298 evidence disagrees with several studies, which report a higher final incidence associated with early  
 299 symptoms (Filippi and Prabhu 1997; Long et al. 2001; Nasruddin and Amin 2012). However, the  
 300 environmental conditions in our study were very different from those explored in the cited  
 301 literature, and other findings suggest that in Italy leaf blast does not consistently correlate with PB  
 302 (Biloni and Lorenzi 2002). Similar trends in disease development were reproduced in another  
 303 study focusing on the Italian rice area, where a large variability of leaf and PB severity was due to  
 304 inter-annual meteorological conditions (Bregaglio et al. 2016).  
 305 Compared to the experiments performed in 2011 and 2012 (Titone et al. 2015), where tricyclazole  
 306 efficacy was evaluated as a single application at a rate of 450 a.i. g/ha, the substance was less  
 307 effective in reducing PB, with comparable results only with a double application (average PB  
 308 incidence reduction of 25% with single and 61% with the double application at 3 WAT, compared  
 309 to 55% in the previous study). A possible explanation may be is that in 2015-2018 the PB

Mongiano *et al.* 2020, submitted to European Journal of Plant Pathology

310 incidence was much lower than in the previous study (43% mean incidence at 3 WAT) (Titone et  
311 al. 2015).

312 Our study confirmed that correct timing in the fungicide application is critical in reducing PB  
313 impact and must consider both the variety-specific phenological development and the development  
314 of the pathogen. The effect of a single treatment with tricyclazole was, in fact, very variable both  
315 between years and between cultivars within years. Results with the double application were more  
316 stable, having provided a more extended protection period also for very early or very late cultivars  
317 and therefore better control of the disease.

318 The experimental design forced us to simultaneously apply fungicides to all varieties without  
319 considering the differences in phenology and, therefore, the period of greater susceptibility to the  
320 disease (i.e. booting). This is a limitation, given that targeting the timing of fungicide application  
321 for each variety could have maximized the treatment effect, even if it would have complicated the  
322 execution of the experiment. A major improvement in the present study is the execution of a late  
323 assessment at 6 WAT, aimed at better characterizing PB incidence and to provide an indication of  
324 disease progression around maturity, outside the protection period granted by the tricyclazole  
325 treatment. Data indicated that, when favourable conditions for disease development were present,  
326 disease control had a long-lasting effect probably connected to a reduction of the inoculum source  
327 and thus, the occurrence of secondary infections. This has also been observed in *in vitro* studies  
328 (Kunova et al. 2012) and suggested by the results of the double application, which provided a  
329 more extended protection period and prevented the spread of inoculum sources.

330 One of the aspects that remains unexplored here is the impact of the treatment in reducing grain  
331 and milling yield losses. PB is indeed known to affect both the quantity and quality of rice yield,  
332 with a significant impact on both the gross saleable product and the selling price, as rice mills  
333 considerably reduce the purchase price of paddy rice stocks with low processing yields. Our  
334 results, however, indicate that fungicide application could be more economically justified with  
335 high-value varieties with low blast resistance, a widespread situation in the Italian rice varietal  
336 landscape (Titone et al. 2015).

337 Similarly to our previous study, more than 65% of the tested cultivars were found to be moderately  
338 susceptible to susceptible, and only 4 (about 8%) were classified as resistant. Therefore, even  
339 recently released varieties show low tolerance to blast disease, and this is still a critical issue for  
340 rice cultivation in Italy. Moreover, given that some reference varieties were more susceptible in

Mongiano *et al.* 2020, submitted to European Journal of Plant Pathology

our experiment than in the past, we could hypothesize an evolution of *M. oryzae* strains leading to the breakdown of some partial resistances, which is a phenomenon consistently observed in the fields (Oliveira-Garcia and Valent 2015; Rama Devi et al. 2015).

## Conclusions

The most effective, environmentally-friendly and economical strategy to control rice blast is the adoption of host resistance. However, plant breeding is an expensive and time-consuming activity requiring many years for pyramiding multiple blast resistance genes and release a new cultivar. At the same time, the pathogen population is capable of overcoming resistance genes in a relatively short period. Most of the high value, traditional Italian rice varieties, as well as the majority of recently releases confirmed to be susceptible to the disease. When genetic resistance is not an option, proper agronomic management, optionally coupled with fungicide application is, therefore, crucial to safeguard agricultural production and grower's income in the years to come.

# References

- 354 Ballini, E., Nguyen, T. T., & Morel, J.-B. (2013). Diversity and genetics of nitrogen-induced  
355 susceptibility to the blast fungus in rice and wheat. *Rice*, 6(1), 32. doi:10.1186/1939-8433-6-  
356 32
- 357 Biloni, M., & Lorenzi, E. (2002). Relation between leaf and neck blast resistance in Italian rice  
358 varieties [*Oryza sativa* L. - Lombardy]. Presented at the Atti delle Giornate Fitopatologiche  
359 (Italy), Pavia, Italy.
- 360 Bregaglio, S., Titone, P., Cappelli, G., Tamborini, L., Mongiano, G., & Confalonieri, R. (2016).  
361 Coupling a generic disease model to the WARM rice simulator to assess leaf and panicle blast  
362 impacts in a temperate climate. *European Journal of Agronomy*, 76, 107–117.  
363 doi:10.1016/j.eja.2016.02.009
- 364 Bregaglio, S., Titone, P., Hossard, L., Mongiano, G., Savoini, G., Piatti, F. M., et al. (2017).  
365 Effects of agro-pedo-meteorological conditions on dynamics of temperate rice blast  
366 epidemics and associated yield and milling losses. *Field Crops Research*, 212, 11–22.  
367 doi:10.1016/j.fcr.2017.06.022
- 368 Couch, B. C., & Kohn, L. M. (2002). A multilocus gene genealogy concordant with host  
369 preference indicates segregation of a new species, *Magnaporthe oryzae*, from *M. grisea*.  
370 *Mycologia*, 94(4), 683–693. doi:10.1080/15572536.2003.11833196
- 371 Deng, Y., Zhai, K., Xie, Z., Yang, D., Zhu, X., Liu, J., et al. (2017). Epigenetic regulation of  
372 antagonistic receptors confers rice blast resistance with yield balance. *Science*, 355(6328),  
373 962–965. doi:10.1126/science.aai8898
- 374 European Council, European Parliament. (2000). Directive 2000/60/EC of 23 October 2000  
375 establishing a framework for Community action in the field of water policy. *Official Journal*,  
376 L 327, 1–73. [https://eur-lex.europa.eu/legal-](https://eur-lex.europa.eu/legal-content/EN/TXT/HTML/?uri=CELEX:32000L0060&from=EN)  
377 [content/EN/TXT/HTML/?uri=CELEX:32000L0060&from=EN](https://eur-lex.europa.eu/legal-content/EN/TXT/HTML/?uri=CELEX:32000L0060&from=EN)
- 378 Faivre-Rampant, O., Bruschi, G., Abbruscato, P., Cavigiolo, S., Picco, A. M., Borgo, L., et al.  
379 (2010). Assessment of genetic diversity in Italian rice germplasm related to agronomic traits  
380 and blast resistance (*Magnaporthe oryzae*). *Molecular Breeding*, 27(2), 233–246.  
381 doi:10.1007/s11032-010-9426-0
- 382 Filippi, M. C., & Prabhu, A. S. (1997). Integrated Effect of Host Plant Resistance and Fungicidal  
383 Seed Treatment on Rice Blast Control in Brazil. *Plant Disease*, 81(4), 351–355.  
384 doi:10.1094/PDIS.1997.81.4.351
- 385 Fox, J. (1997). *Applied regression analysis, linear models, and related methods*. Thousand Oaks,  
386 CA: Sage Publications, Inc.
- 387 IRRI. (2002). *Standard Evaluation System for Rice (SES)*. International Rice Research Institute.  
388 <http://www.knowledgebank.irri.org/images/docs/rice-standard-evaluation-system.pdf>
- 389 Koutroubas, S. D., Katsantonis, D., Ntanos, D. A., & Lupotto, E. (2009). Blast fungus inoculation  
390 reduces accumulation and remobilization of pre-anthesis assimilates to rice grains.  
391 *Phytopathologia Mediterranea*, 48(2), 240–252.
- 392 Kunova, A., Pizzatti, C., & Cortesi, P. (2012). Impact of tricyclazole and azoxystrobin on growth,  
393 sporulation and secondary infection of the rice blast fungus, *Magnaporthe oryzae*. *Pest*  
394 *Management Science*, 69(2), 278–284. doi:10.1002/ps.3386
- 395 Li, Y. B., Wu, C. J., Jiang, G. H., Wang, L. Q., & He, Y. Q. (2007). Dynamic analyses of rice blast  
396 resistance for the assessment of genetic and environmental effects. *Plant Breeding*, 126(5),  
397 541–547. doi:10.1111/j.1439-0523.2007.01409.x
- 398 Long, D. H., Correll, J. C., Lee, F. N., disease, D. T. P., 2001. (2001). Rice blast epidemics  
399 initiated by infested rice grain on the soil surface. *Am Phytopath Society*  
400 , 85(6), 612–616. doi:10.1094/PDIS.2001.85.6.612
- 401 Mantegazza, R., Biloni, M., Grassi, F., Basso, B., Lu, B. R., Cai, X. X., et al. (2008). Temporal  
402 Trends of Variation in Italian Rice Germplasm over the Past Two Centuries Revealed by  
403 AFLP and SSR Markers. *Crop Science*, 48(5), 1832. doi:10.2135/cropsci2007.09.0532
- 404 Miah, G., Rafii, M. Y., Ismail, M. R., Puteh, A. B., Rahim, H. A., Asfaliza, R., & Latif, M. A.  
405 (2012). Blast resistance in rice: a review of conventional breeding to molecular approaches.  
406 *Molecular Biology Reports*, 40(3), 2369–2388. doi:10.1007/s11033-012-2318-0
- 407 Ministero delle Politiche Agricole Alimentari e Forestali. (2014). Criteri e procedure tecniche per  
408 l'iscrizione al Registro Nazionale di varietà di riso. *Gazzetta Ufficiale della Repubblica*  
409 *Italiana - Serie Generale n. 91*. [http://scs.entecra.it/prove\\_iscrizioni/criteri\\_riso/Criteri-Riso-](http://scs.entecra.it/prove_iscrizioni/criteri_riso/Criteri-Riso-GU-91-18-4-2014.pdf)  
410 [GU-91-18-4-2014.pdf](http://scs.entecra.it/prove_iscrizioni/criteri_riso/Criteri-Riso-GU-91-18-4-2014.pdf)



Mongiano *et al.* 2020, submitted to European Journal of Plant Pathology

- 411 Mongiano, G., Titone, P., Tamborini, L., Pilu, R., & Bregaglio, S. (2018). Evolutionary trends and  
412 phylogenetic association of key morphological traits in the Italian rice varietal landscape.  
413 *Scientific Reports*, 8(1), 13612. doi:10.1038/s41598-018-31909-1
- 414 Na, G., Aa, K., V Ga, M., La, R., & Sb, R. (2019). Morphological and molecular characterization  
415 of *Magnaporthe oryzae* B. Couch, inciting agent of rice blast disease. *Madras Agricultural*  
416 *Journal*, 106(Spl), 1–7. doi:10.29321/MAJ.2019.000256
- 417 Nasruddin, A., & Amin, N. (2012). Effects of Cultivar, Planting Period, and Fungicide Usage on  
418 Rice Blast Infection Levels and Crop Yield. *Journal of Agricultural Science*, 5(1), 160–167.  
419 doi:10.5539/jas.v5n1p160
- 420 Oliveira-Garcia, E., & Valent, B. (2015). How eukaryotic filamentous pathogens evade plant  
421 recognition. *Current Opinion in Microbiology*, 26, 92–101. doi:10.1016/j.mib.2015.06.012
- 422 Pinheiro, J., & Bates, D. (2006). *Mixed-effects models in S and S-PLUS*. Springer Science &  
423 Business Media.
- 424 Pinheiro, J., Bates, D., DebRoy, S., Sarkar, D., R Core Team. (2019). *nlme: Linear and Nonlinear*  
425 *Mixed Effects Models*.
- 426 R Core Team. (2017). R: A Language and Environment for Statistical Computing. [http://www.R-](http://www.R-project.org/)  
427 [project.org/](http://www.R-project.org/)
- 428 Rama Devi, S. J. S., Singh, K., Umakanth, B., Vishalakshi, B., Renuka, P., Vijay Sudhakar, K., et  
429 al. (2015). Development and Identification of Novel Rice Blast Resistant Sources and Their  
430 Characterization Using Molecular Markers. *Rice Science*, 22(6), 300–308.  
431 doi:10.1016/j.rsci.2015.11.002
- 432 Ramalingam, J., Vera Cruz, C. M., Kukreja, K., Chittoor, J. M., Wu, J. L., Lee, S. W., et al.  
433 (2003). Candidate defense genes from rice, barley, and maize and their association with  
434 qualitative and quantitative resistance in rice. *Molecular Plant-Microbe Interactions*, 16(1),  
435 14–24. doi:10.1094/MPMI.2003.16.1.14
- 436 Regione Piemonte. (2016). Deliberazione della Giunta Regionale, n. 32-2952. Piano di Gestione  
437 del Distretto idrografico del Fiume Po 2015-2021 - disposizioni attuative delle misure  
438 regionali per la riduzione dei prodotti fitosanitari nelle acque attraverso l'implementazione del  
439 Piano d'Azione Nazionale per l'uso sostenibile dei prodotti fitosanitari. Area a vocazione  
440 risicola.  
441 [http://www.regione.piemonte.it/governo/bollettino/abbonati/2016/08/attach/dgr\\_02952\\_930\\_](http://www.regione.piemonte.it/governo/bollettino/abbonati/2016/08/attach/dgr_02952_930_22022016.pdf)  
442 [22022016.pdf](http://www.regione.piemonte.it/governo/bollettino/abbonati/2016/08/attach/dgr_02952_930_22022016.pdf)
- 443 Searle, S. R., Speed, F. M., & Milliken, G. A. (1980). Population marginal means in the linear  
444 model: An alternative to least squares means. *The American Statistician*, 34, 216–221.
- 445 Simko, I., & Piepho, H.-P. (2012). The Area Under the Disease Progress Stairs: Calculation,  
446 Advantage, and Application. *Phytopathology*, 102(4), 381–389. doi:10.1094/phyto-07-11-  
447 0216
- 448 Spada, A., Mantegazza, R., Biloni, M., Caporali, E., & Sala, F. (2004). Italian rice varieties:  
449 historical data, molecular markers and pedigrees to reveal their genetic relationships. *Plant*  
450 *Breeding*, 123(2), 105–111. doi:10.1046/j.1439-0523.2003.00950.x
- 451 Titone, P., Mongiano, G., & Tamborini, L. (2015). Resistance to neck blast caused by *Pyricularia*  
452 *oryzae* in Italian rice cultivars. *European Journal of Plant Pathology*, 142(1), 49–59.  
453 doi:10.1007/s10658-014-0588-1
- 454 Wang, F., Wang, C., Liu, P., Lei, C., Hao, W., Gao, Y., et al. (2016). Enhanced Rice Blast  
455 Resistance by CRISPR/Cas9-Targeted Mutagenesis of the ERF Transcription Factor Gene  
456 OsERF922. *PLoS ONE*, 11(4), e0154027–18. doi:10.1371/journal.pone.0154027
- 457 Webster, R. K., & Gunnell, P. S. (1992). *Compendium of rice diseases*. (pp. 14–16). American  
458 Phytopathological Society.
- 459 Weeks, D. P., Spalding, M. H., & Yang, B. (2016). Use of designer nucleases for targeted gene  
460 and genome editing in plants. *Plant Biotechnology Journal*, 14(2), 483–495.  
461 doi:10.1111/pbi.12448
- 462 Wickham, H. (2016). *ggplot2: Elegant Graphics for Data Analysis*. Springer-Verlag New York.  
463 <http://ggplot2.tidyverse.org/>
- 464 Xiao, N., Wu, Y., Pan, C., Yu, L., Chen, Y., Liu, G., et al. (2017). Improving of Rice Blast  
465 Resistances in *Japonica* by Pyramiding Major R Genes. *Frontiers in plant science*, 7(6258),  
466 340–10. doi:10.3389/fpls.2016.01918
- 467 Zhao, H., Wang, X., Jia, Y., Minkenberg, B., Wheatley, M., Fan, J., et al. (2018). The rice blast  
468 resistance gene Ptr encodes an atypical protein required for broad-spectrum disease  
469 resistance. *Nature communications*, 1–12. doi:10.1038/s41467-018-04369-4
- 470



# Figures

**Fig. 1** Frequency histogram of varieties by disease severity scores (IRRI scale) assigned in the field trials during the three years of experiment, divided in early and late assessments for untreated control and fungicide treatment in single and double application

**Fig. 2** Distributions of incidence values recorded in the experiment, comparing early and late evaluation and divided into the three years of testing and the three evaluated treatments: untreated and tricyclazole in single and double application. Boxplot were drawn showing: the median (horizontal line), IQR (upper and lower hinges), and 95% confidence intervals around the median (the whiskers); the square marks indicate the group mean

**Fig. 3** Distribution of Area Under Disease Progress Stairs (AUDPS) values over the three years of trials, comparing untreated plots with single and double application of tricyclazole, dividing reference varieties (n = 14) from tested varieties (n = 48). Boxplot were drawn showing: the median (horizontal line), IQR (upper and lower hinges), and 95% confidence intervals around the median (the whiskers); the square marks indicate the group mean

**Fig. 4** Mean values of calculated area under disease progress stairs (AUDPS) for the tested cultivars considering PB incidence assessed in untreated plots. The error bars indicate the 95% confidence interval around the mean calculated using a non-parametric bootstrap method. Plot background is color-coded to show the ranges of the four susceptibility classes used to group the cultivars as resistant (R), moderately resistant (MR), moderately susceptible (MS), and susceptible (S)

Treatment    ■ Untreated    ■ Single    ■ Double

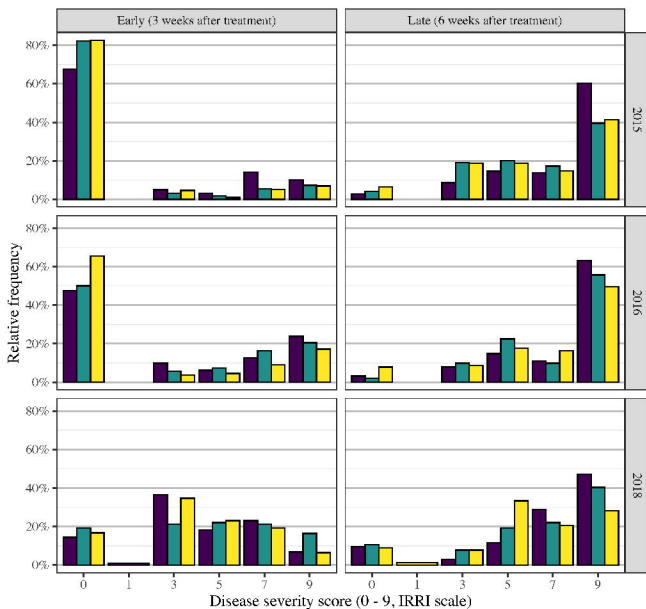

Reference varieties Tested varieties

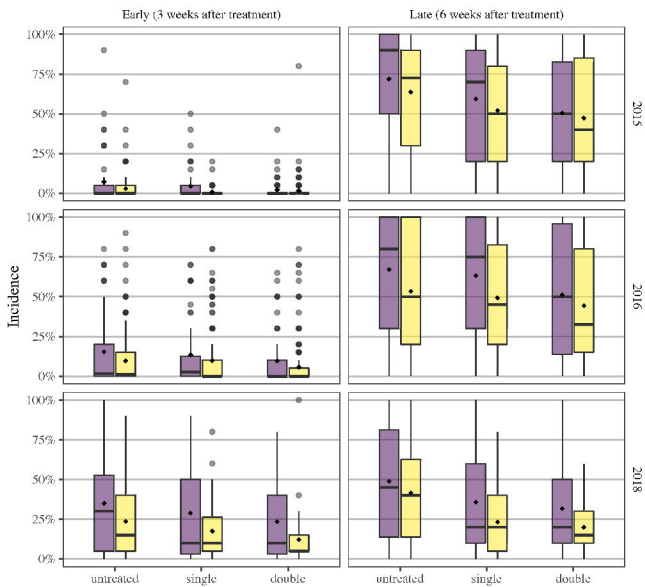

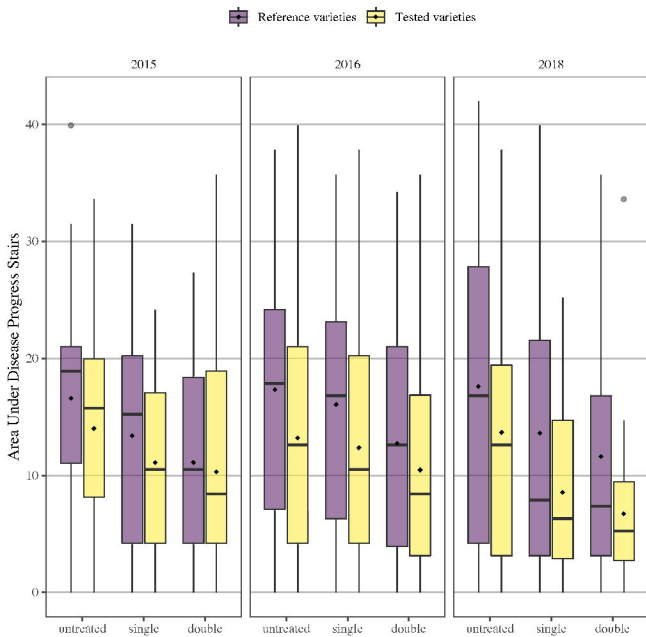

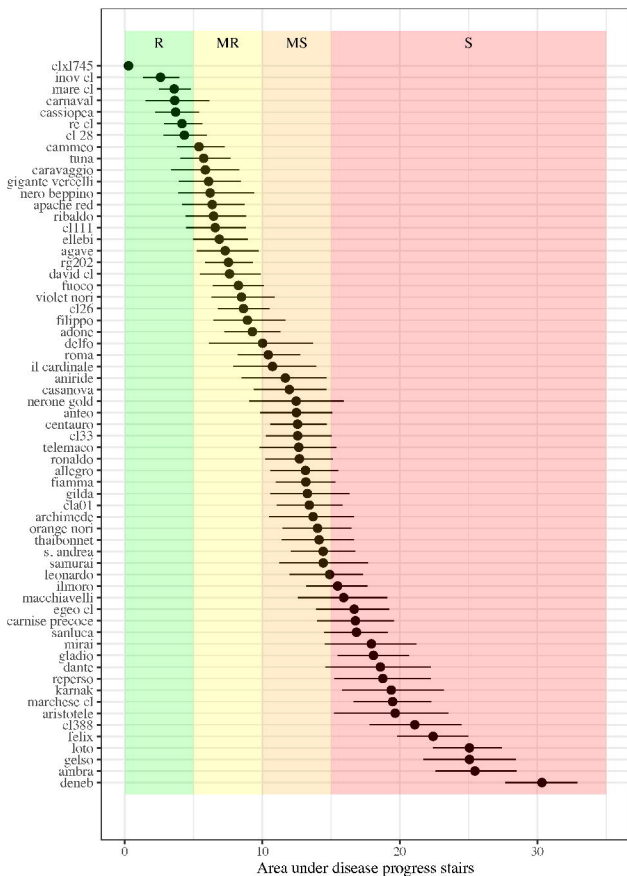

Source: https://www.biorxiv.org/content/10.1101/2020.04.23.057554v1.full.pdf
